# Supplementary material for: Epitheliocystis in Greater Amberjack: Evidence of a Novel Causative Agent, Pathology, Immune Response and Epidemiological Findings
Source: MDPI journal article supplement (doi:10.3390/microorganisms10030627), 2022-03-15
Supplement: s1 [file s1]

## **SUPPLEMENTARY MATERIAL DATA**

**Supplementary Table S1.** Samplings data from the first outbreak of epitheliocystis in Souda bay (Crete, Greece) in Greater amberjack (cohort 2017).

| Date (dd/mm/yyyy) | Temp °C | number of fish<br>sampled | Approximate fish<br>weight (g) |
|-------------------|---------|---------------------------|--------------------------------|
| 08/12/2017        | 18      | 5                         | -                              |
| 11/12/2017        | 18      | 11                        | 200 g                          |
| 10/01/2018        | 16.5    | 6                         | 300 g                          |

**Supplementary Table S2.** Sampling data (cohorts 2018) from the monitoring program of epitheliocystis in Souda bay (Crete, Greece). When location is HCMR, sampling was performed in indoor tanks right before the transfer to the sea cages. In bolt outbreak samples. Sampling 09/2018 (2) was a duplicate sampling to evaluate the progression of the outbreak.

| Date<br>(mm/yyyy) | location | Temperature<br>(°C) | gilthead seabream |                        |                       |                              | greater amberjack |                        |                       |                                 | meagre         |                        |                    |                                 |
|-------------------|----------|---------------------|-------------------|------------------------|-----------------------|------------------------------|-------------------|------------------------|-----------------------|---------------------------------|----------------|------------------------|--------------------|---------------------------------|
|                   |          |                     | Sample<br>size    | Mean<br>length<br>(cm) | Mean<br>weight<br>(g) | Prevalence<br>Chlam/ Ichthyo | Sample<br>size    | Mean<br>length<br>(cm) | Mean<br>weight<br>(g) | Prevalence<br>Chlam/<br>Ichthyo | Sample<br>size | Mean<br>length<br>(cm) | Mean<br>weight (g) | Prevalence<br>Chlam/<br>Ichthyo |
| 04/2018           | Souda    | 18.5                | 10                | 7                      | 5.5                   | 0/0                          | -                 | -                      | -                     | -                               | -              | -                      | -                  | -                               |
| 06/2018           | Souda    | 24.7                | 12                | 11                     | 24                    | 1/0                          | -                 | -                      | -                     | -                               | -              | -                      | -                  | -                               |
| 07/2018           | HCMR     | -                   | -                 | -                      | -                     | -                            | 10                | 11                     | 1.8                   | 0/0                             | 5              | 5                      | 2                  | 0/0                             |
| 08/2018           | Souda    | 27.6                | 10                | 16                     | 69                    | 0/6                          | 10                | 13                     | 29                    | 3/10                            | 10             | 10                     | 14                 | 0/0                             |
| 09/2018           | Souda    | 26.4                | 10                | 17                     | 86                    | 4/3                          | <b>10</b>         | <b>23</b>              | <b>170</b>            | <b>6/9</b>                      | 10             | 16                     | 62                 | 0/0                             |
| 09/2018(2) *      | Souda    | -                   | -                 | -                      | -                     | -                            | 5*                | 22                     | 149                   | 4/4                             | -              | -                      | -                  | -                               |
| 11/2018           | Souda    | 21.5                | 10                | 20                     | 152                   | 3/8                          | 10                | 31                     | 459                   | 10/5                            | 10             | 27                     | 233                | 0/0                             |
| 12/2018           | Souda    | 18.5                | 10                | 22                     | 230                   | 7/7                          | 10                | 32                     | 496                   | 10/8                            | 10             | 28                     | 274                | 1/0                             |
| 01/2019           | Souda    | 16.2                | 10                | 24                     | 246                   | 10/4                         | 10                | 35                     | 578                   | 8/7                             | 10             | 26                     | 248                | 0/0                             |
| 05/2019           | Souda    | 19.1                | 10                | 26                     | 330                   | 7/5                          | 10                | 38                     | 812                   | 7/7                             | 10             | 33                     | 361                | 0/0                             |
| 07/2019           | Souda    | 26                  | 10                | 28                     | 376                   | 8/0                          | 10                | 26                     | 1252                  | 9/9                             | 10             | 29                     | 300                | 0/0                             |

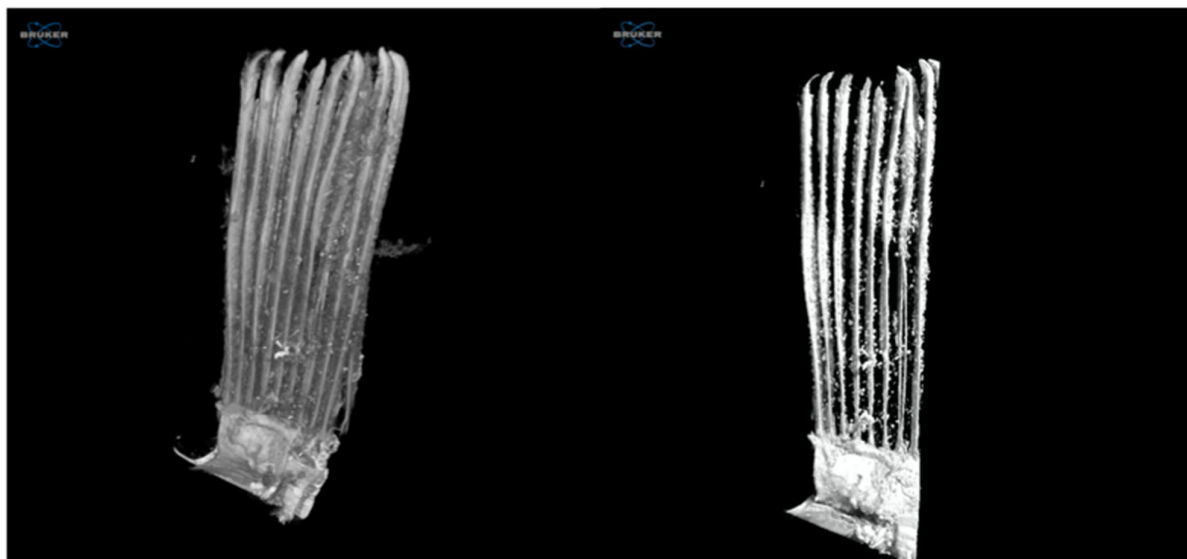

**Supplementary Figure S1.** 3D rendering of epitheliocystis infected gill fragment from Greater amberjack. In the second image denser structure are enhanced, showing presence of cysts in all the lengths of the filaments.

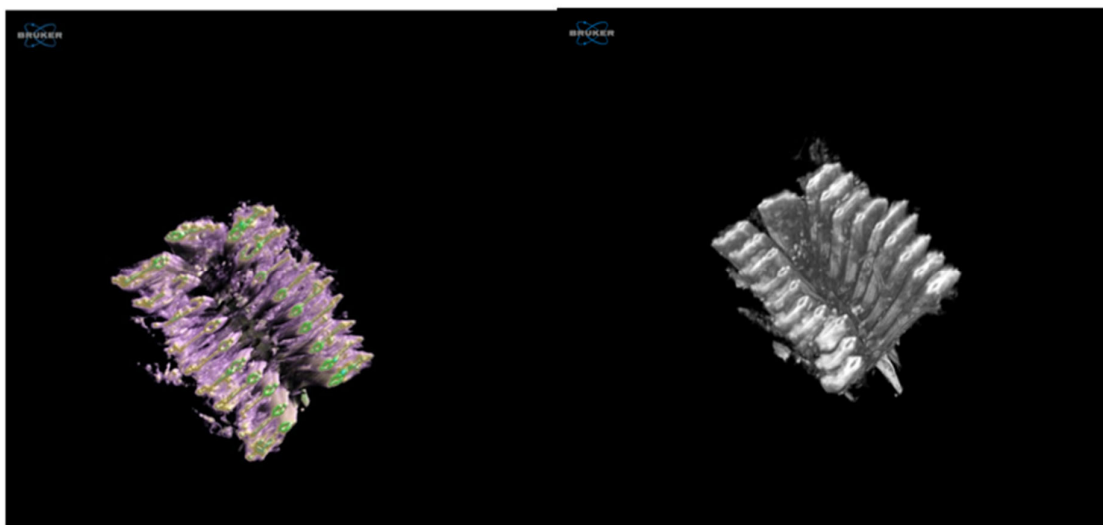

**Supplementary Figure S2.** 3D rendering of epitheliocystis infected gill fragment from Greater amberjack. The section shows the area between the holobranchs in proximity to the gill arch. The area between the hemibranchs is interspersed by proliferative tissue.
