# Supplementary material for: Epitheliocystis in Greater Amberjack: Evidence of a Novel Causative Agent, Pathology, Immune Response and Epidemiological Findings
Source: MDPI journal article supplement (doi:10.3390/microorganisms10030627), 2022-03-15
Supplement: s1 [file s1]

Link to supplementary file 4: [video from micro-CT](#)
